# Supplementary material for: A coevolution analysis for identifying protein-protein interactions by Fourier transform
Source: PubMed Central journal article supplement (PMC5400233; doi:10.1371/journal.pone.0174862), 2017-04-21
Supplement: pone.0174862.s001.pdf [file pone.0174862.s001.pdf]

# A Coevolution Analysis for Identifying Protein-Protein Interactions by Fourier Transform

Changchuan Yin<sup>1</sup>, Stephen S.-T. Yau<sup>2\*</sup>

**1 Department of Mathematics, Statistics and Computer Science, The University of Illinois at Chicago, Chicago, IL 60607-7045, USA**

**2 Department of Mathematical Sciences, Tsinghua University, Beijing 100084, China**

## Fourier transform of VP24 protein in Ebola virus

The following program is to compute Fourier transform of VP proteins sequence (1-50 amino acid positions) in Ebola virus.

### Python programs

```
import numpy as np
from scipy.fftpack import fft

def DFTHydrophobicity(seq):
    AAHydrophobicity = {'A': 1.8, 'R': -4.5, 'N': -3.5, 'D': -3.5, \
        'C': 2.5, 'Q': -3.5, 'E': -3.5, 'G': -0.4, 'H': -3.2, 'I': 4.5, 'L': 3.8, \
        'K': -3.9, 'M': 1.9, 'F': 2.8, 'P': -0.9, 'S': -0.8, 'T': -0.7, 'W': -0.9, \
        'Y': -1.3, 'V': 4.2, 'U': 0.0, 'X': 0.0} #X is for padding zeros
    n=len(seq)
    listAA=np.zeros(n) #define zeros list of length n
    print('1.Symbolic_sequence:\n',seq)

    for i in range(0,n): # use index from 0 to n
        aa=seq[i]
        listAA[i]=AAHydrophobicity[aa]
    print('2.Numerical_sequence:\n',listAA)

    fftAA = fft(listAA)

    ps=np.abs(fftAA[0:n])
    ps=pow(ps,2)

    R=fftAA.real
    I=fftAA.imag

    vRI=[]

    for i in range(0,n):
```

```

vRI.append(R[i])
for i in range(0,n):
    vRI.append(I[i])

print('3.DFT_of_the_numerical_sequence:\n',fftAA)

return [ps,vRI]

# Test: first 50 amino acids of VP24 protein
#>AIE11921.1 VP24 [Zaire ebolavirus]
seq='MAKATGRYNLISPKKDLEKGVVLSDLNFLVSQTIQGWKVYWAGIEFDVT\
HKG MALLHRLKTNDFAPAWSMTRNLFPHLFQNPNSTIESPLWALRVILAA\
GIQDQLIDQSLIEPLAGALGLISDWLLTTNTNHFNMRTQRVKEQSLKML\
SLIRSNILKFKLDALHVVNYNGLLSSIEIGTQNHHTIITRTNMGFLVE\
LQEPDKSAMNRKKPGPAKFSLLHESTLKAFTQGSSTRMQSLILEFNSSLAI'
seq=seq[0:50]
[ps,vRI]=DFTHydrophobicity(seq)

```

### Result of the Python programs

The result of the program is as follows, showing the numerical representation of the protein sequence and its Fourier transform coefficients.

1.Symbolic protein sequence:

MAKATGRYNLISPKKDLEKGVVLSDLNFLVSQTIQGWKVYWAGIEFDVT

2.Numerical sequence:

```

[ 1.9  1.8 -3.9  1.8 -0.7 -0.4 -4.5 -1.3 -3.5  3.8
  4.5 -0.8 -0.9 -3.9 -3.9 -3.5  3.8 -3.5 -3.9 -0.4
  4.2  4.2  3.8 -0.8 -3.5  3.8  2.5 -3.5  2.8  3.8
  4.2 -0.8 -3.5 -0.7  4.5 -3.5 -0.4 -0.9 -3.9  4.2
 -1.3 -0.9  1.8 -0.4  4.5 -3.5  2.8 -3.5  4.2 -0.7]

```

3.DFT of the numerical sequence:

```

[ 2.00000000 +0.j -10.05609249+12.07554328j
 23.10414000 +4.85505075j -12.08537106 +4.92520703j
 -3.80405050+12.79259628j 30.95951949 -3.62413697j
 -3.67895877-15.28872799j 7.88604472 -4.62125878j
-24.95072022 +5.27475602j 8.35277509+23.28276524j
 31.53773076 +7.8823957j -30.41582296 +5.25522425j
 22.40105719-10.03739826j -7.01295130 -0.13009415j
 0.11893514-11.68915139j 9.94048051+16.04028152j
 14.02191734-11.18154017j -22.87419050-15.67641379j
 13.75713104-16.46518361j -2.22513158+14.23051355j
-16.53773076 -4.46013878j -9.15040650-16.50879912j
 16.51259726-37.7952284j 2.33114658-22.78838915j
 -2.23204849 -9.10374548j 21.20000000 +0.j -2.23204849 +9.10374548j
 2.33114658+22.78838915j 16.51259726+37.7952284j
 -9.15040650+16.50879912j -16.53773076 +4.46013878j
 -2.22513158-14.23051355j 13.75713104+16.46518361j
-22.87419050+15.67641379j 14.02191734+11.18154017j
 9.94048051-16.04028152j 0.11893514+11.68915139j
 -7.01295130 +0.13009415j 22.40105719+10.03739826j
-30.41582296 -5.25522425j 31.53773076 -7.8823957j
 8.35277509-23.28276524j -24.95072022 -5.27475602j
 7.88604472 +4.62125878j -3.67895877+15.28872799j

```

30.95951949 +3.62413697j -3.80405050-12.79259628j  
-12.08537106 -4.92520703j 23.10414000 -4.85505075j  
-10.05609249-12.07554328j]
